# Supplementary material for: Biodegradable polymeric microcapsules for selective ultrasound-triggered drug release
Source: Royal Society of Chemistry journal article supplement (doi:10.1039/c1sm05324h), 2011-01-01
Supplement: c1sm05324h.pdf [file c1sm05324h.pdf]

---

## Supporting Information

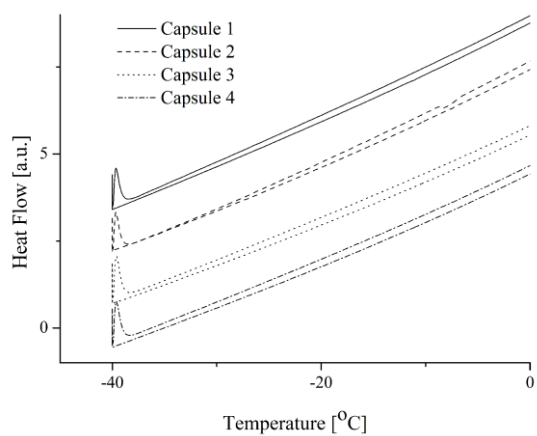

**S1.** DSC graph (endo up) of the four different PFO-PLLA capsules after lyophilisation.

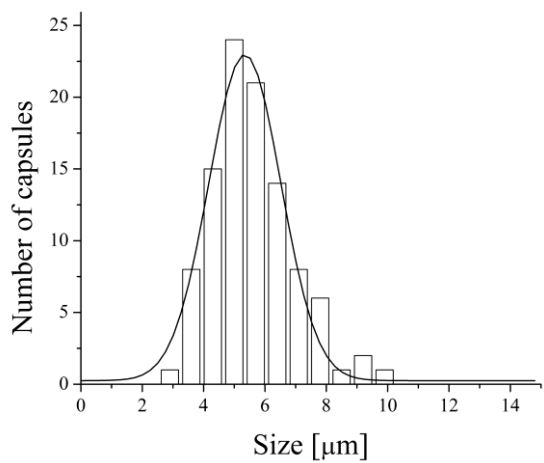

S2 Size distribution of the capsules (based on 100 capsules counted by hand). The size of the capsules is  $5.3 \pm 2.3 \mu\text{m}$ .

Equation I

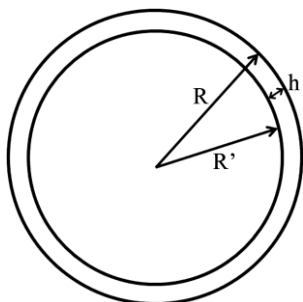

Calculating the shell thickness of a capsule ( $h$ ) with a variable radius of the capsule ( $R$ ):

$$V_{\text{capsule}} = V_{\text{core}} + V_{\text{shell}}$$

$$\frac{4}{3} \pi R^3 = \frac{4}{3} \pi (R')^3 + \frac{m_{\text{polymer}}}{\rho_{\text{polymer}}}$$

$$\frac{4}{3} \pi R^3 = \frac{4}{3} \pi (R')^3 + \frac{\rho_{\text{polymer}}}{V_{\text{decane}}} V_{\text{core}}$$

Assuming that all the polymer ends up in the shell, this results in:

$$V_{\text{decane}} = V_{\text{core}} = \frac{4}{3} \pi (R')^3$$

$$R' = \frac{R}{\sqrt[3]{1+f}}, \text{ where } f = \frac{m_{\text{polymer}}}{\rho_{\text{polymer}} V_{\text{decane}}}$$

$$h = R - R'$$

with  $m_{\text{polymer}}$  = weighed amount of polymer [g],  $\rho_{\text{polymer}}$  = density of the polymer [ $\text{g}/\text{cm}^3$ ],<sup>7</sup>  $V_{\text{decane}}$  = amount of decane [mL],  $R$  = measured diameter of the capsule/2 [ $\mu\text{m}$ ] and  $h$  = thickness of the shell [ $\mu\text{m}$ ].
